# Supplementary material
Source: PubMed Central journal article supplement (PMC7790865)

Full unedited gel for Figure 1C (horizontally flipped)

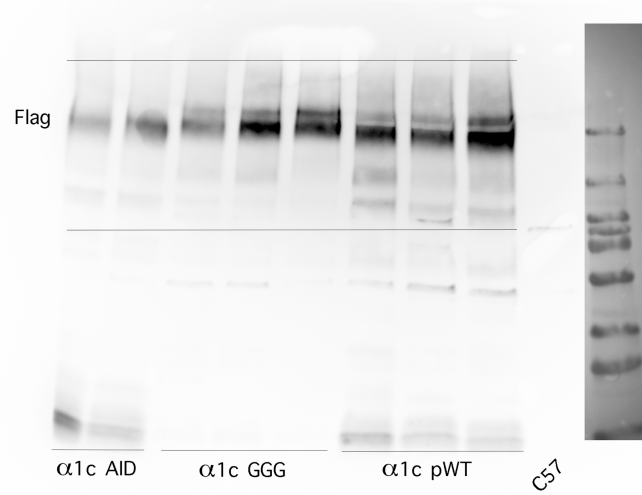

Full unedited gel for Figure 1C (lower, horizontally flipped)

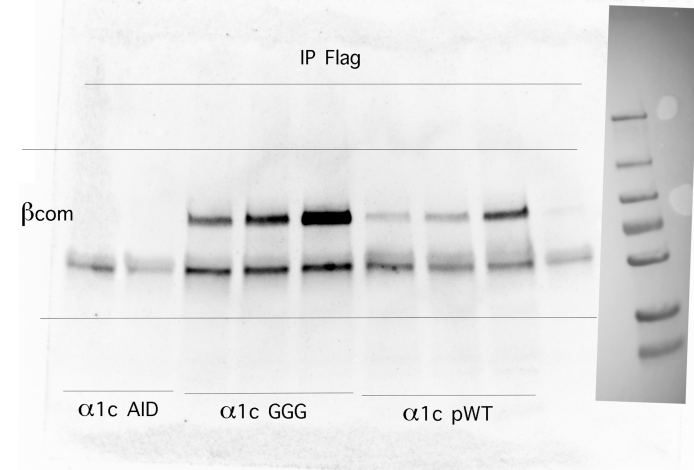

Full unedited gel for Figure 3C (lower)

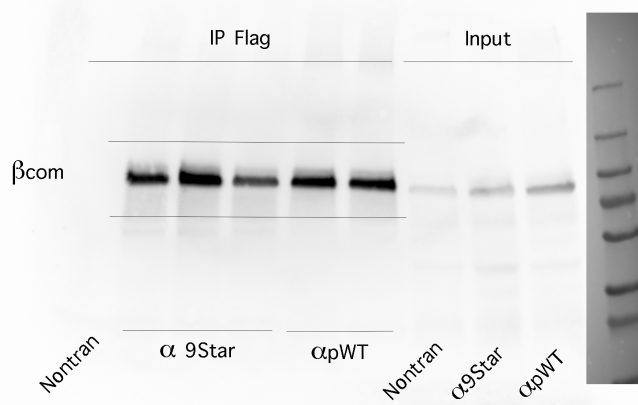

Full unedited gel for Figure 3C (upper)

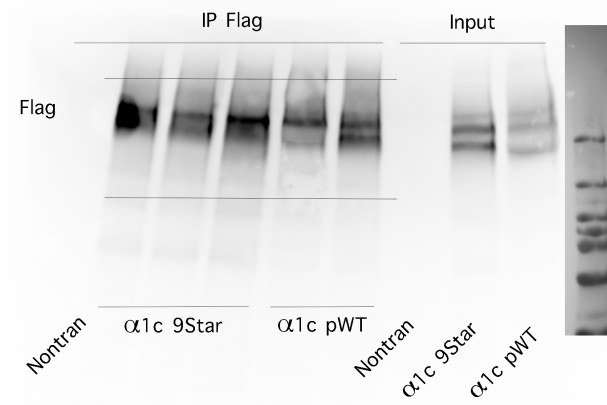

Supplement: NIHMS1640699-supplement-317839_Uncut_Gel_Blots.pdf [file NIHMS1640699-supplement-317839_Uncut_Gel_Blots.pdf]
